# Supplementary material for: IL-6-targeted ultrasmall superparamagnetic iron oxide nanoparticles for optimized MRI detection of atherosclerotic vulnerable plaques in rabbits
Source: PubMed Central journal article supplement — RSC Adv. 2020 Apr 17;10(26):15346–53. doi: 10.1039/c9ra10509c (PMC9052309; doi:10.1039/c9ra10509c), 2020-04-17
Supplement: RA-010-C9RA10509C-s001.pdf [file RA-010-C9RA10509C-s001.pdf]

## Supporting Information

### **IL-6-targeted Ultrasmall Superparamagnetic Iron Oxide Nanoparticles for Optimized MRI Detection of Atherosclerotic Vulnerable Plaques in Rabbits**

Huaqiang Mo, ‡<sup>a, b</sup> Chenxing Fu, ‡<sup>a, b</sup> Zhiye Wu,<sup>a, b</sup> Peng Liu,<sup>a, b</sup> Zhibo Wen,<sup>c</sup> Qingqing Hong,<sup>a, b</sup> Yanbin Cai,<sup>\*a, b</sup> and Gongxin Li<sup>\*a, b</sup>

<sup>a</sup> Department of Cardiology, Zhujiang Hospital, Southern Medical University, Guangzhou 510280, People's Republic of China; E-mail: ligxin@163.com.

<sup>b</sup> Laboratory of Heart Center, Zhujiang Hospital, Sino-Japanese Cooperation Platform for Translational Research in Heart Failure, Guangdong Provincial Biomedical Engineering Technology Research Center for Cardiovascular Diseases, Guangzhou 510280, People's Republic of China; E-mail: skyer1@smu.edu.cn.

<sup>c</sup> Department of Radiology, Zhujiang Hospital, Southern Medical University, Guangzhou 510280, People's Republic of China.

‡ These authors equally contributed to this work.

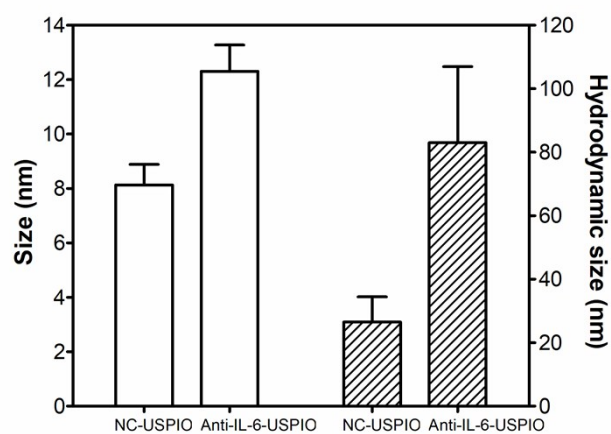

Fig. S1 TEM size (left), hydrodynamic size (right) of NC-USPIO and anti-IL-6-USPIO.

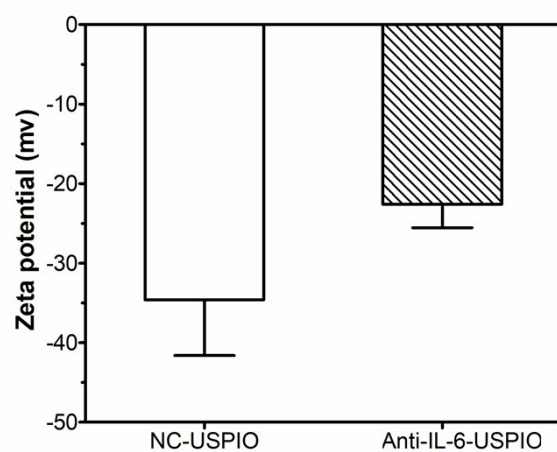

Fig. S2 Zeta potential of NC-USPIO and anti-IL-6-USPIO.

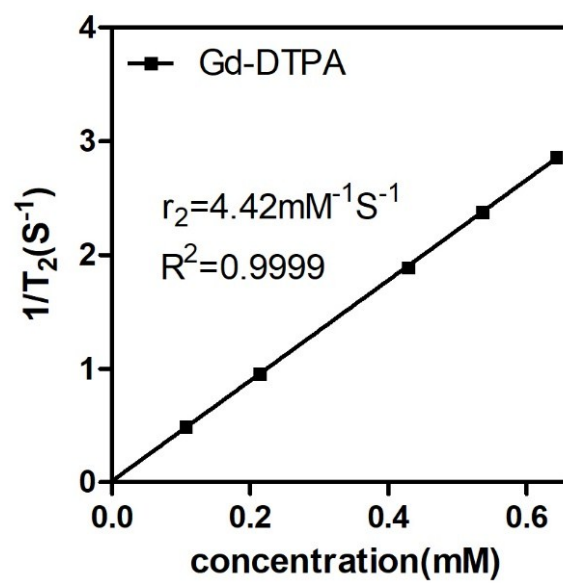

Fig.S3 The correlation between different concentrations and  $1/T_2$  in Gd-DTPA.

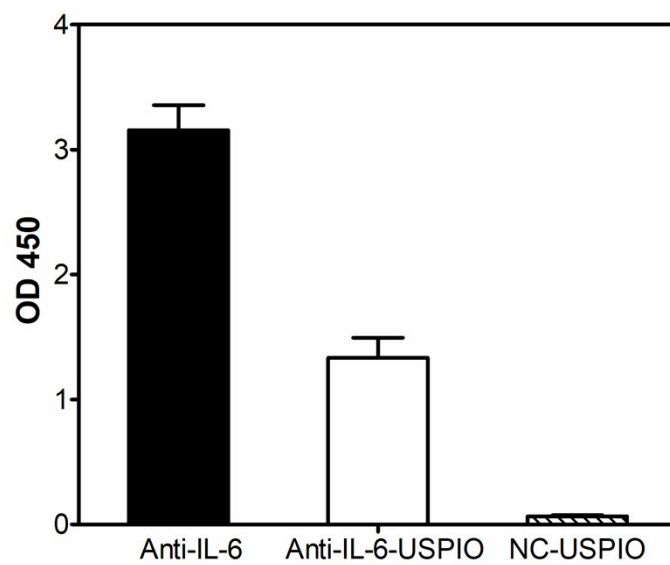

Fig.S4 ELISA results show the activity of anti-IL-6-USPIO on OD450 value.

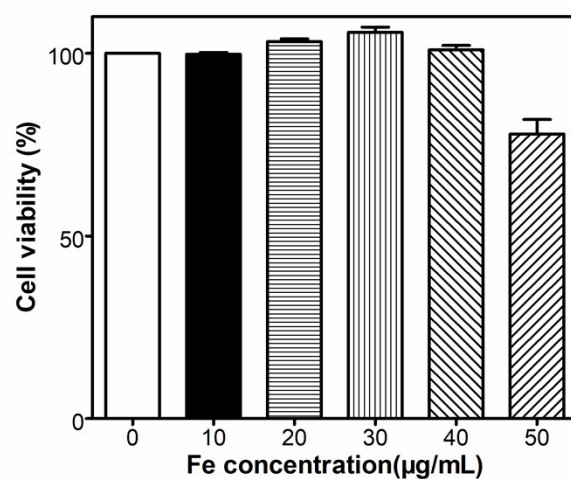

Fig. S5 In vitro cytotoxicity test of anti-IL-6-USPIO against HUVECs. CCK-8 assay results for evaluating the viability of the cells after incubation with different concentrations of Fe for 48 h.

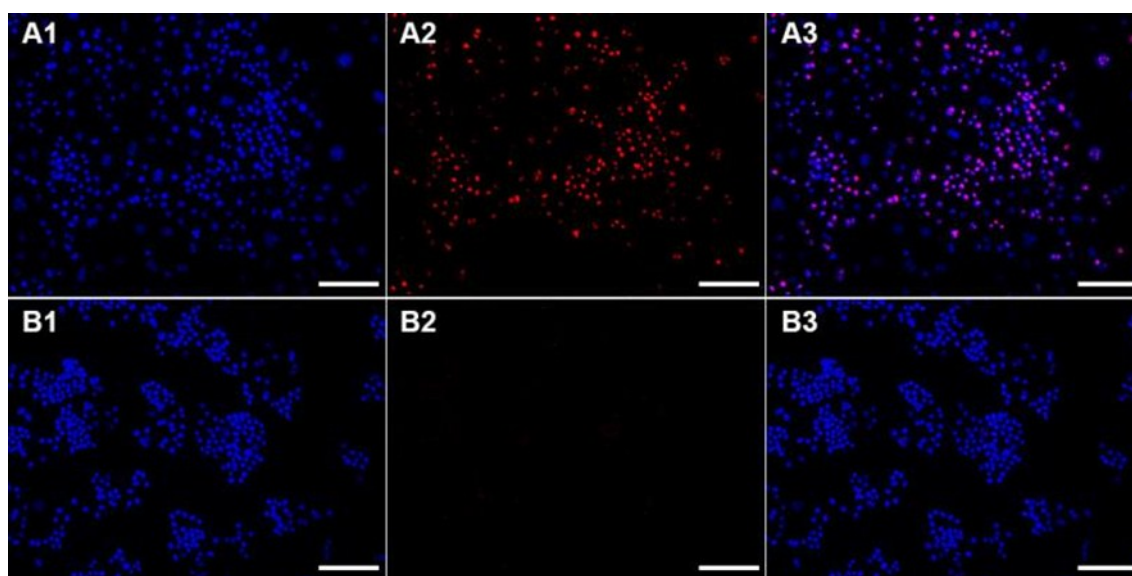

Fig. S6 Confocal microscopy images of macrophages after 24 h incubation with LPS (A) and without LPS (B).

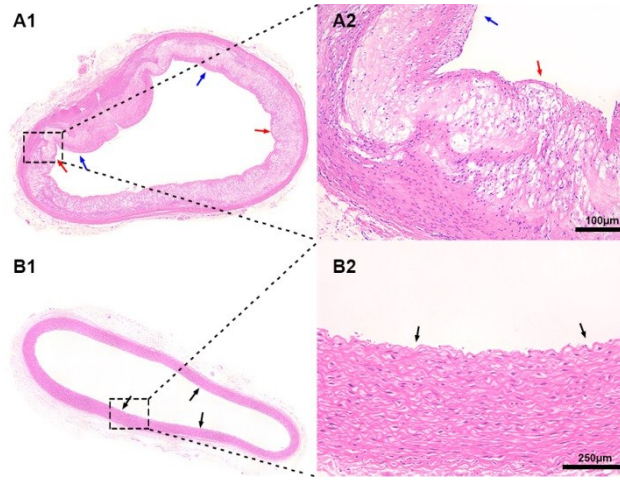

Fig. S7 HE staining in control (B2) and experimental (A2) group with pathological section of signal variation (Original magnification:  $\times 200$  or  $\times 100$ ), the two groups are respectively showed in Figure B1 and A1 (Original magnification:  $\times 50$ ). Red and blue arrows in A show vulnerable plaque and stable plaque respectively.

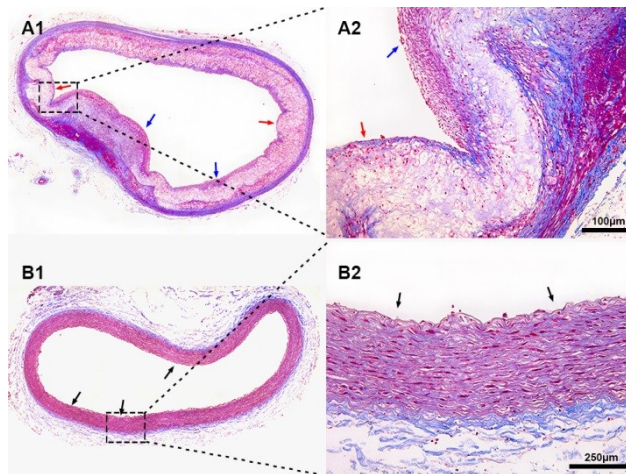

Fig. S8 Masson staining in control (B2) and experimental (A2) group with pathological section of signal variation (Original magnification:  $\times 200$  or  $\times 100$ ), the two groups are respectively showed in Figure B1 and A1 (Original magnification:  $\times 50$ ). Red and blue arrows in A show vulnerable plaque and stable plaque respectively.

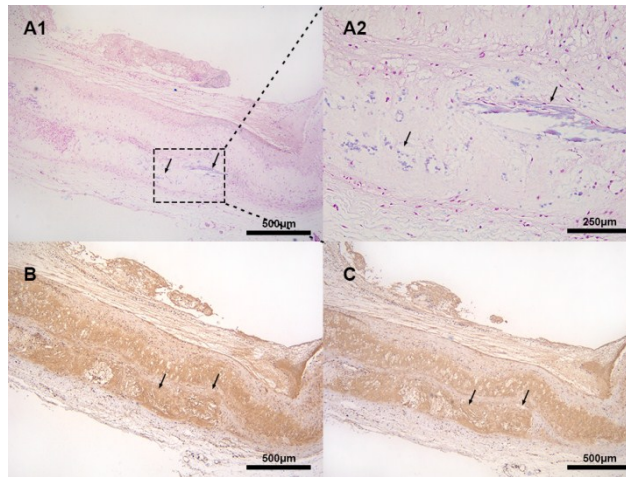

Fig. S9 Prussian blue staining (A1×50, A2×200), Immunohistochemistry staining of IL-6 (B×50) and CD68 (C×50) in experimental group. black arrows in A show the iron deposition in atherosclerotic plaques.

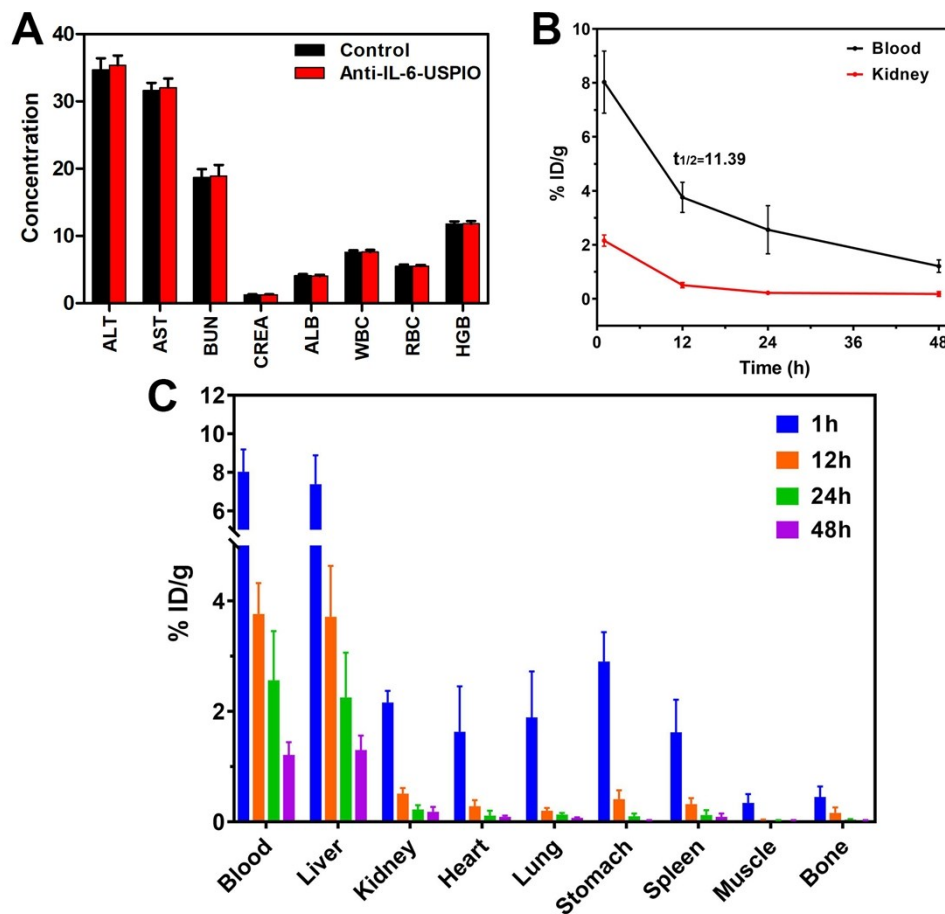

Fig. S10 A) Blood analysis of Anti-IL-6-USPIO with different blood index. B) The time-activity curve of  $^{125}\text{I}$ -Anti-IL-6-USPIO in kidney and blood, respectively. C) The biodistribution of  $^{125}\text{I}$ -Anti-IL-6-USPIO measured at 1, 12, 24, and 48 h post injection.

Tab. S1 Comparison of SNR in blood vessel walls before and after injection of NC-USPIO. (Mean  $\pm$  SD, \*P<0.01 vs. Plain scan)

| Group             | Plain scan       | Time after NC-USPIO enhancement scan (h) |                   |
|-------------------|------------------|------------------------------------------|-------------------|
|                   |                  | 24                                       | 48                |
| Experiment (n=45) | 40.59 $\pm$ 1.25 | 28.09 $\pm$ 1.58*                        | 23.98 $\pm$ 2.53* |
| Control(n=15)     | 39.70 $\pm$ 1.60 | 39.53 $\pm$ 1.92                         | 39.26 $\pm$ 1.89  |

Tab. S2 Comparison of SNR in blood vessel walls before and after injection of anti-IL-6-USPIO. (Mean  $\pm$  SD, \*P<0.01 vs. Plain scan)

| Group             | Plain scan       | Time after anti-IL-6-USPIO enhancement scan (h) |                   |
|-------------------|------------------|-------------------------------------------------|-------------------|
|                   |                  | 24                                              | 48                |
| Experiment (n=45) | 40.59 $\pm$ 1.25 | 21.94 $\pm$ 2.47*                               | 16.88 $\pm$ 2.47* |
| Control(n=15)     | 39.70 $\pm$ 1.60 | 39.23 $\pm$ 2.19                                | 39.05 $\pm$ 2.25  |

Tab. S3 Comparison of plaque detection rate in three contrast agents. (\*P=0.007 vs. Gd-DTPA,  $\chi^2=7.252$ ; #P=0.039 vs. Gd-DTPA,  $\chi^2=4.270$ ; ^P=0.714 (Fisher probabilities) vs. NC-USPIO)

| Contrast agent  | Positive     | Negative  |
|-----------------|--------------|-----------|
| Anti-IL-6-USPIO | 42 (93.3) *^ | 3 (6.7)   |
| NC-USPIO        | 40 (88.9) #  | 5 (11.1)  |
| Gd-DTPA         | 31 (68.9)    | 14 (31.1) |

Tab. S4 Comparison of vulnerable plaque detection rate in three contrast agents. (\*P=0.014 vs. Gd-DTPA,  $\chi^2=6.067$ ; #P=0.200 vs. Gd-DTPA,  $\chi^2=1.641$ ; ^P=0.350 (Fisher probabilities) vs. NC-USPIO)

| Contrast agent  | Positive     | Negative |
|-----------------|--------------|----------|
| Anti-IL-6-USPIO | 25 (96.2) *^ | 1 (3.8)  |
| NC-USPIO        | 22 (84.6) #  | 4 (15.4) |
| Gd-DTPA         | 17 (65.4)    | 9 (34.6) |
